# Supplementary material
Source: Springer Nature journal article supplement (https://www.springermedizin.de/resource/supplementary/13046_2011_500_MOESM10_ESM.pdf/9662362)

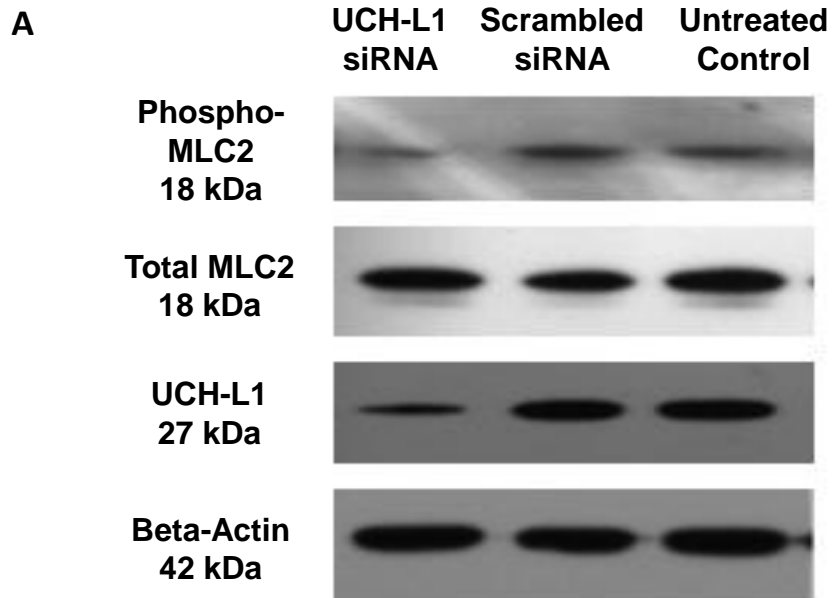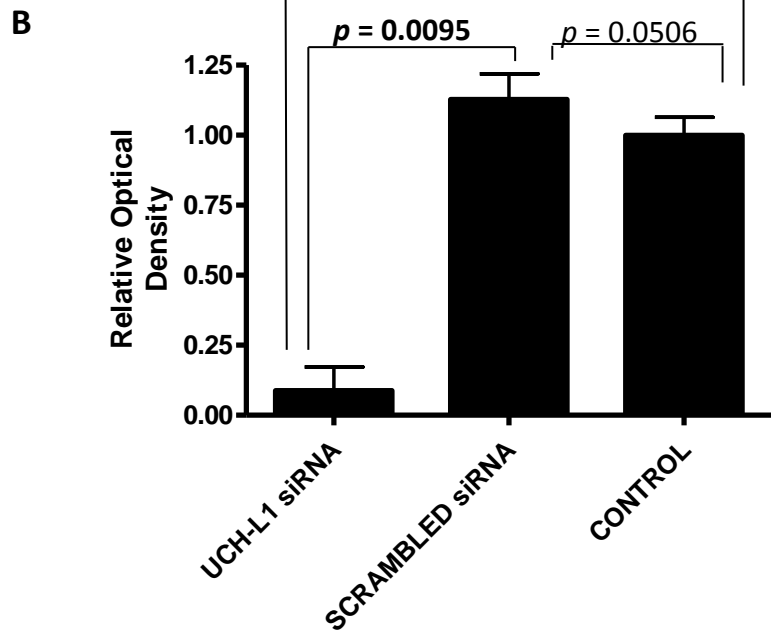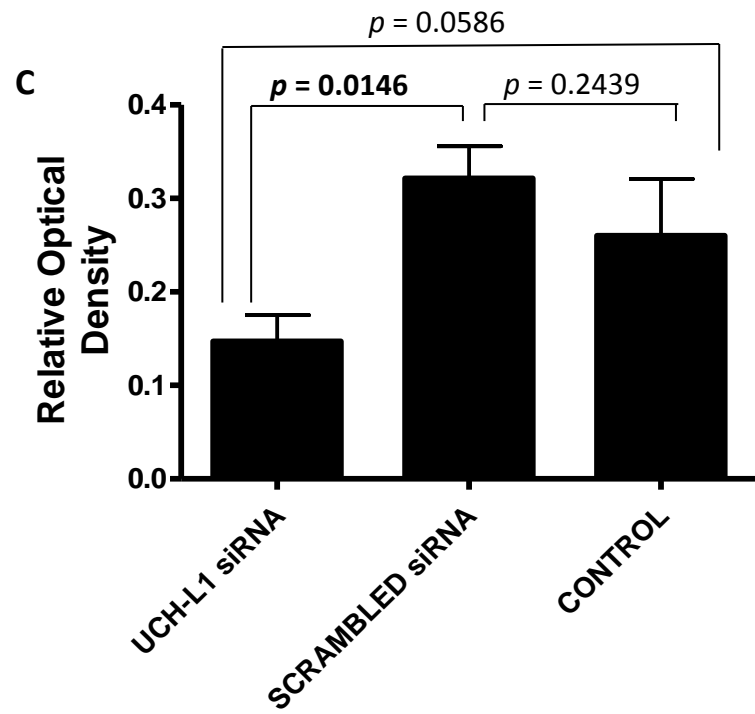

Supplement: MOESM10 [file 9662362]
